# Supplementary material for: Low temperature synthesis study of metal–organic framework CPO-27: investigating metal, solvent and base effects down to −78 °C
Source: Royal Society of Chemistry journal article supplement (doi:10.1039/c7dt01223c), 2017-01-01
Supplement: c7dt01223c1.pdf [file c7dt01223c1.pdf]

# Low Temperature Synthesis Study on Metal-Organic Framework CPO-27: Investigating Metal, Solvent and Base Effects down to -78 °C

S. M. Vornholt<sup>‡</sup>, S. E. Henkelis<sup>‡\*</sup>, R. E. Morris

School of Chemistry, Purdie Building, North Haugh, St Andrews, Fife, KY16 9ST, UK

## SUPPORTING INFORMATION

### Table of Contents

|      |                                                                                |         |
|------|--------------------------------------------------------------------------------|---------|
| 1.   | PXRD Patterns                                                                  | S1      |
| 1.1. | <i>CPO-27-Mg1</i> in MeOH/NaOH (3h, 6h)                                        | S1, S2  |
| 1.2. | <i>CPO-27-Ni1</i> in MeOH/NaOH (3h, 6h)                                        | S3, S4  |
| 1.3. | <i>CPO-27-Zn1</i> in MeOH/NaOH (3h)                                            | S5      |
| 1.4. | <i>CPO-27-Zn2</i> in MeOH/TEA (3h)                                             | S6      |
| 1.5. | <i>CPO-27-Zn3</i> in MeOH/no base (3h)                                         | S7      |
| 1.6. | <i>CPO-27-Zn5</i> in THF/NaOH (3h)                                             | S8      |
| 1.7. | <i>CPO-27-Zn6</i> in THF/TEA (3h, 6h)                                          | S9, S10 |
| 2.   | Pawley Refinement of [Zn(H <sub>2</sub> dhtp)(H <sub>2</sub> O) <sub>2</sub> ] | S11     |
| 3.   | SEM images                                                                     | S12     |
| 3.1. | <i>CPO-27-Mg1</i> in MeOH/NaOH                                                 | S12     |
| 3.2. | <i>CPO-27-Ni1</i> in MeOH/NaOH                                                 | S13     |
| 3.3. | <i>CPO-27-Zn2</i> in MeOH/TEA                                                  | S14     |
| 3.4. | <i>CPO-27-Zn3</i> in MeOH/no base                                              | S15     |
| 3.5. | <i>CPO-27-Zn4</i> in THF/no base                                               | S16     |
| 3.6. | <i>CPO-27-Zn5</i> in THF/NaOH                                                  | S17     |
| 3.7. | <i>CPO-27-Zn6</i> in THF/TEA                                                   | S18     |

## 1. PXRD Patterns

### 1.1 CPO-27-Mg1 in MeOH/NaOH

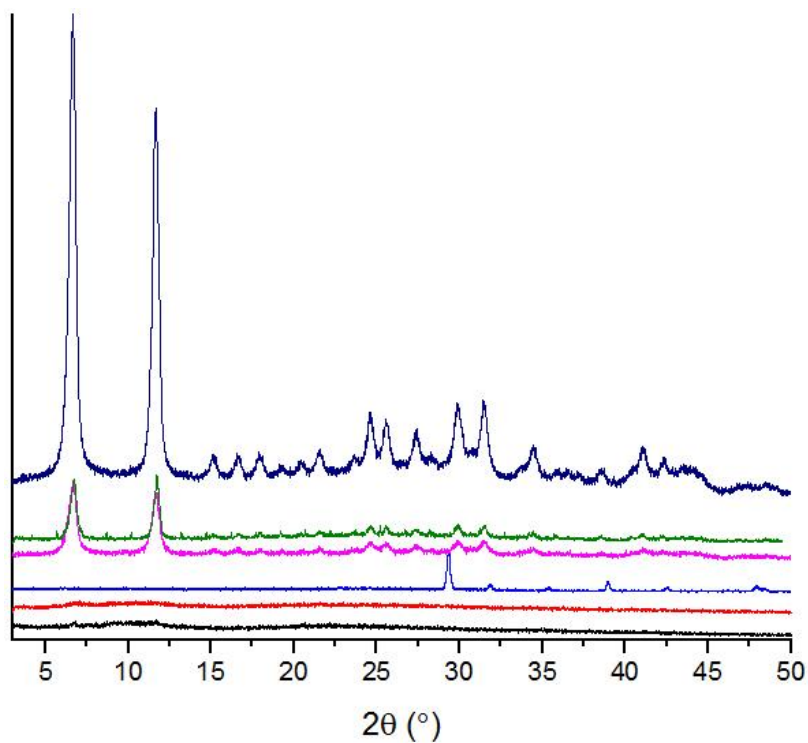

Fig. S1. Powder X-ray diffraction patterns for CPO-27-Mg1 taken half-way through the synthesis (3h). -78 °C – black; -20 °C – red; -40 °C – blue; ambient – pink; 78 °C – green; 0 °C – navy. All diffraction run for 3 hours with the exception of 0 °C which was run for 12 hours.

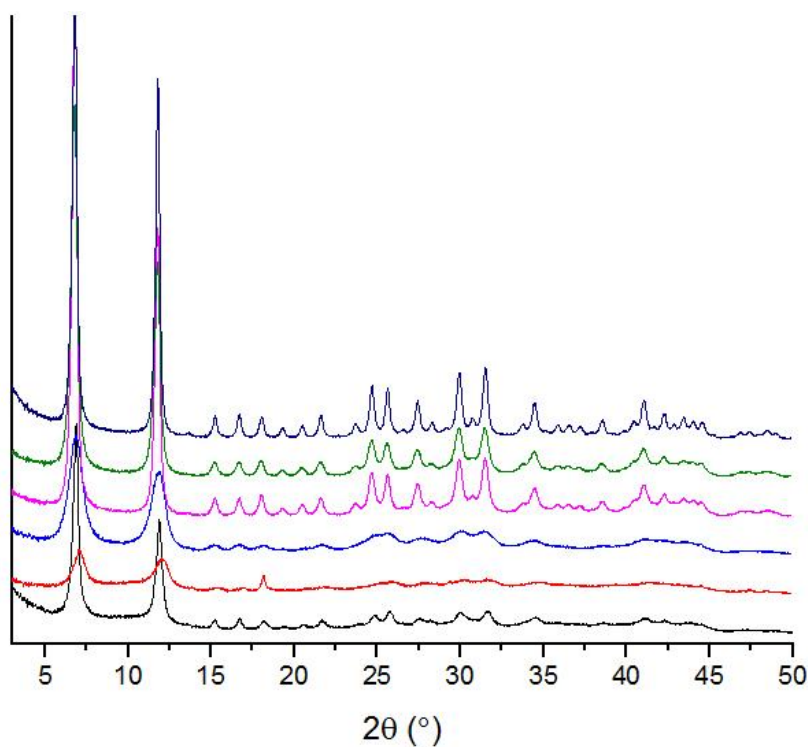

Fig. S2. Powder X-ray diffraction patterns for fully formed CPO-27-Mg1. -78 °C – black; -40 °C – red; -20 °C – blue; 0 °C – pink; ambient – green; 78 °C – navy.

1.2. CPO-27-Ni1 in MeOH/NaOH

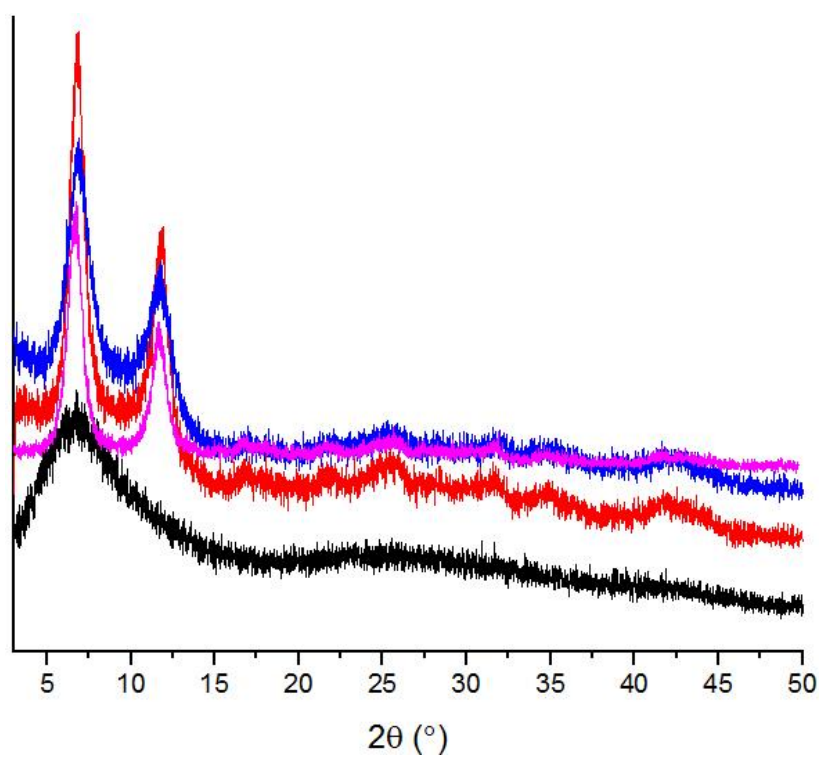

Fig. S3. Powder X-ray diffraction patterns for CPO-27-Ni1 taken half-way through the synthesis (3h). -20 °C – black; 0 °C – red; ambient – blue; 78 °C – pink.

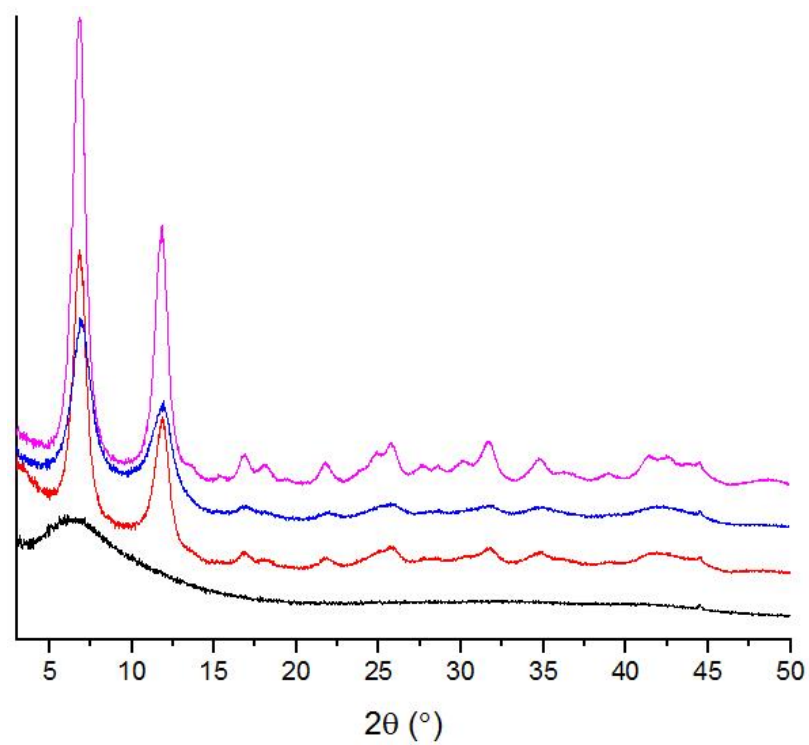

Fig. S4. Powder X-ray diffraction patterns for fully formed CPO-27-Ni1. -20 °C – black; 0 °C – red; ambient – blue; 78 °C – pink.

**1.3. CPO-27-Zn1 in MeOH/NaOH**

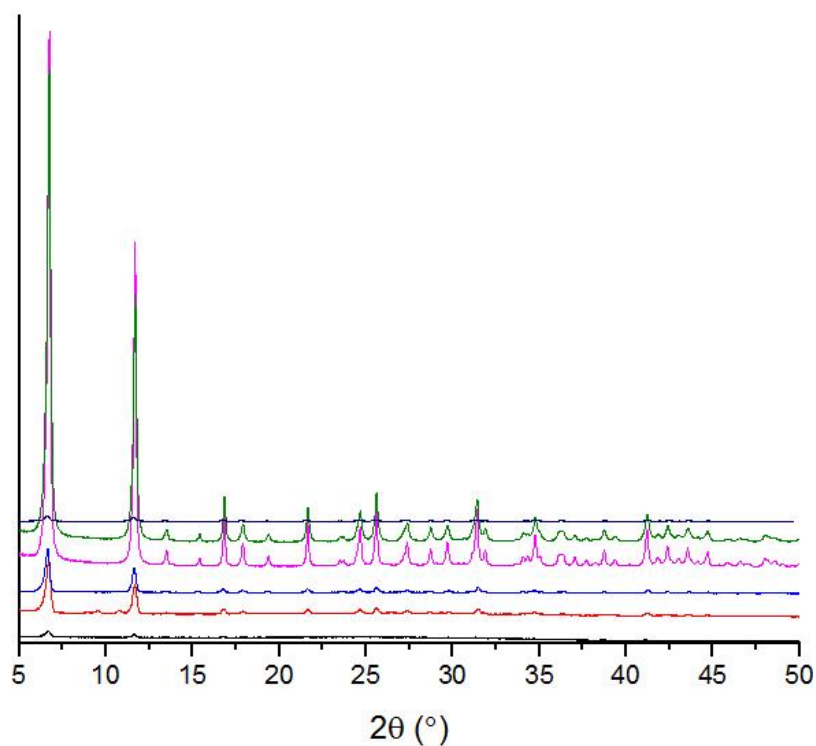

Fig. S5. Powder X-ray diffraction patterns for CPO-27-Zn1 in MeOH/NaOH taken half-way through the synthesis (3h). -78 °C – black; -40 °C – red; -20 °C – blue; 0 °C – pink; ambient – green; 78 °C – navy.

**1.4. CPO-27-Zn2 in MeOH/TEA**

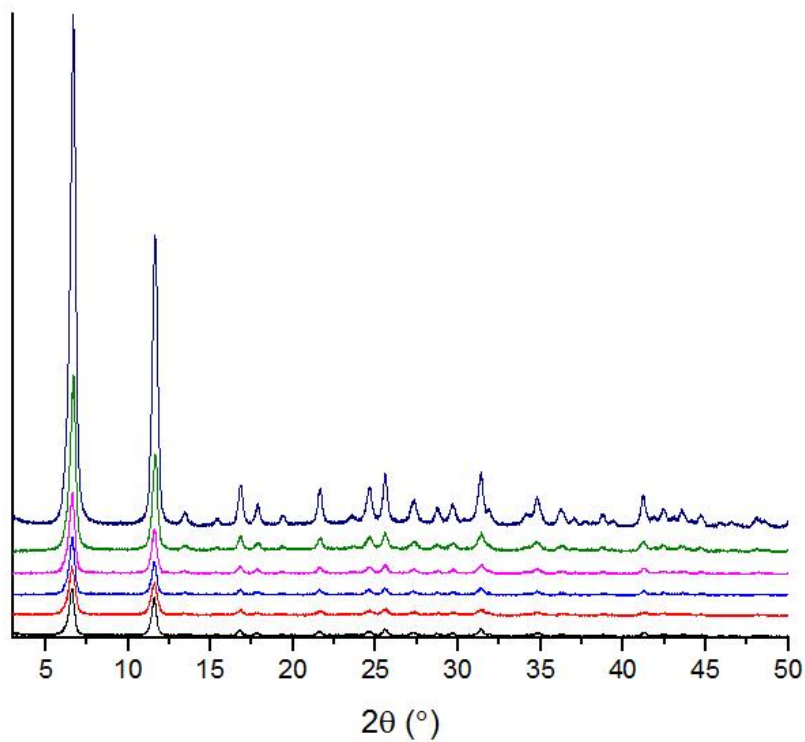

Fig. S6. Powder X-ray diffraction patterns for CPO-27-Zn2 in MeOH/TEA taken half-way through the synthesis (3h). -78 °C – navy; -40 °C – green; -20 °C – pink; 0 °C – blue; ambient – red; 78 °C – black

1.5. **CPO-27-Zn3 in MeOH/no base**

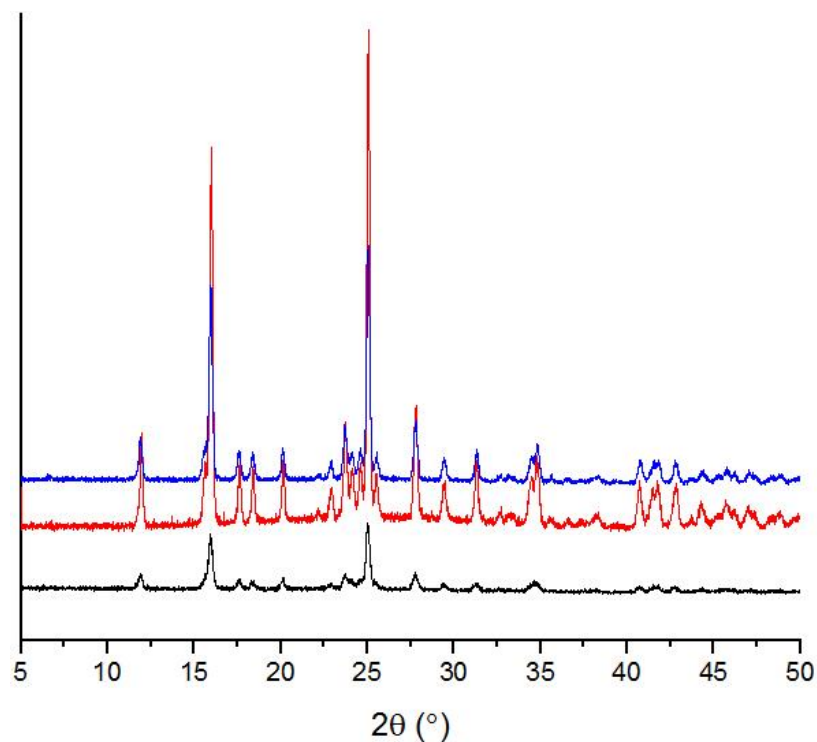

Fig. S7. Powder X-ray diffraction patterns for CPO-27-Zn3 in MeOH without base taken half-way through the synthesis (3h). 0 °C – black; ambient – red; 78 °C – blue.

1.6. **CPO-27-Zn5 in THF/NaOH**

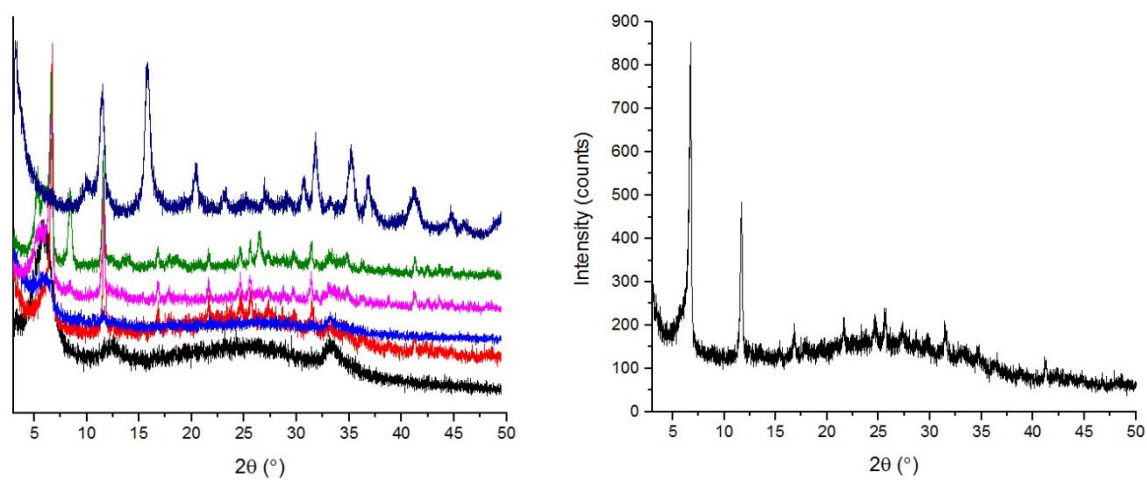

Fig. S8. Left - Powder X-ray diffraction patterns for CPO-27-Zn5 in THF/NaOH taken half-way through the synthesis (3h). -78 °C – navy; -40 °C – green; -20 °C – pink; 0 °C – blue; ambient – red; 78 °C – black. Right – Powder X-ray diffraction pattern for CPO-27-Zn5 in THF/NaOH at -40 °C.

1.7. CPO-27-Zn6 in THF/TEA

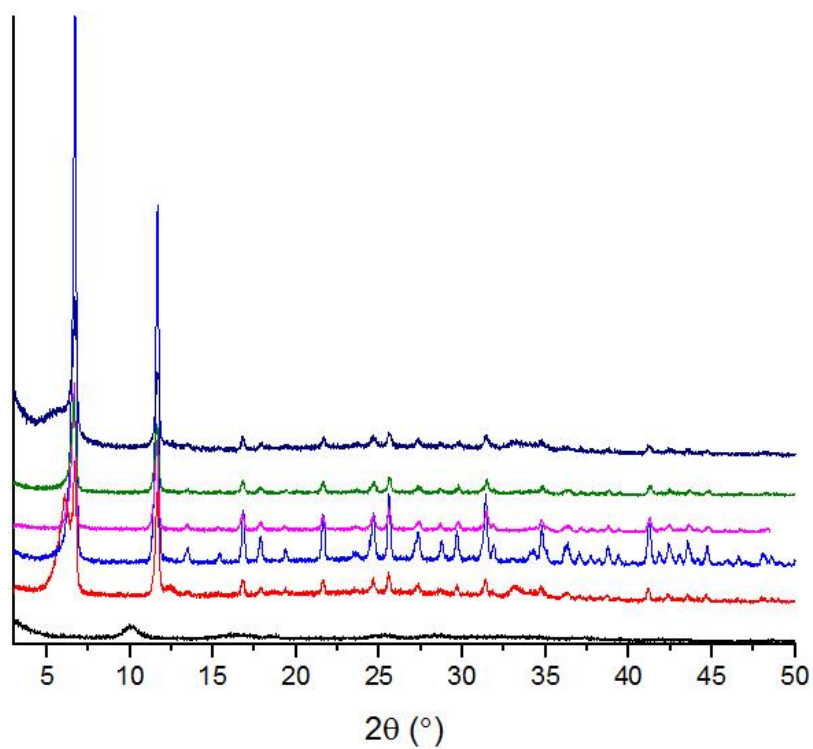

Fig. S9. Powder X-ray diffraction patterns for CPO-27-Zn6 in THF/TEA taken half-way through the synthesis (3h). -78 °C – navy; -40 °C – green; -20 °C – pink; 0 °C – blue; ambient – red; 78 °C – black.

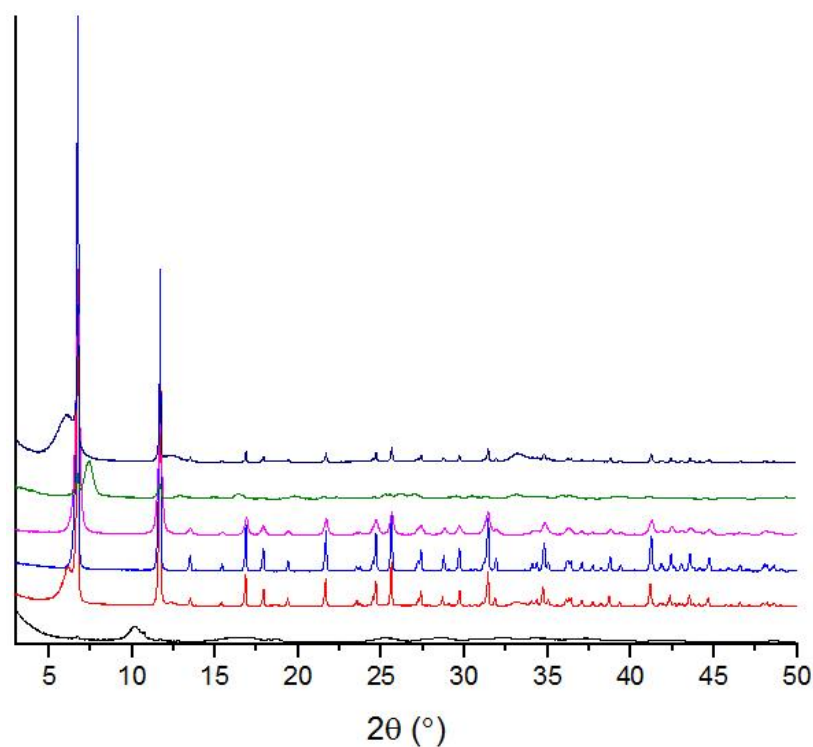

Fig. S10. Powder X-ray diffraction patterns for fully formed CPO-27-Zn6 in THF/TEA. -78 °C – navy; -40 °C – green; -20 °C – pink; 0 °C – blue; ambient – red; 78 °C – black.

## 2. Pawley Refinement of $[\text{Zn}(\text{H}_2\text{dhtp})(\text{H}_2\text{O})_2]$

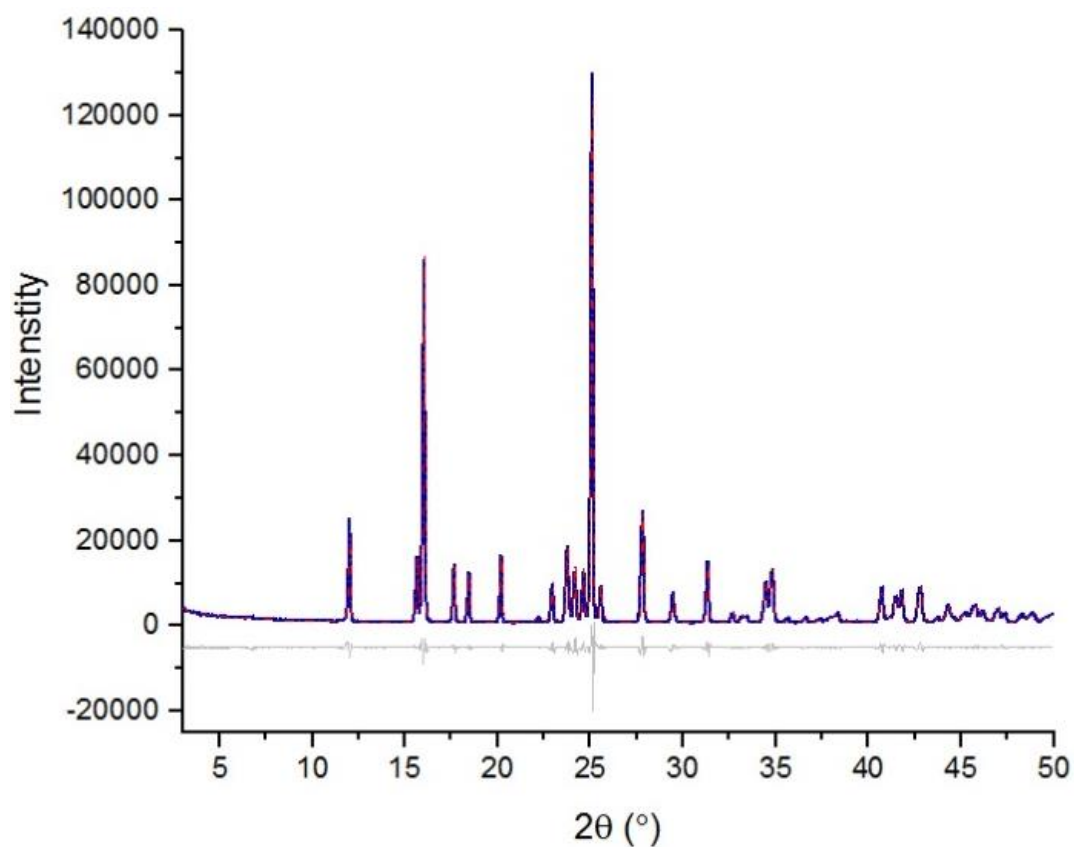

Fig. S11. Topas Pawley refinement for  $[\text{Zn}(\text{H}_2\text{dhtp})(\text{H}_2\text{O})_2]$  afforded from a CPO-27–Zn3 synthesis attempt in MeOH. Experimental in blue, calculated model in red and the calculated difference plot in grey.<sup>22</sup>

## 3. SEM images

### 3.1. CPO-27-Mg1 in MeOH/NaOH

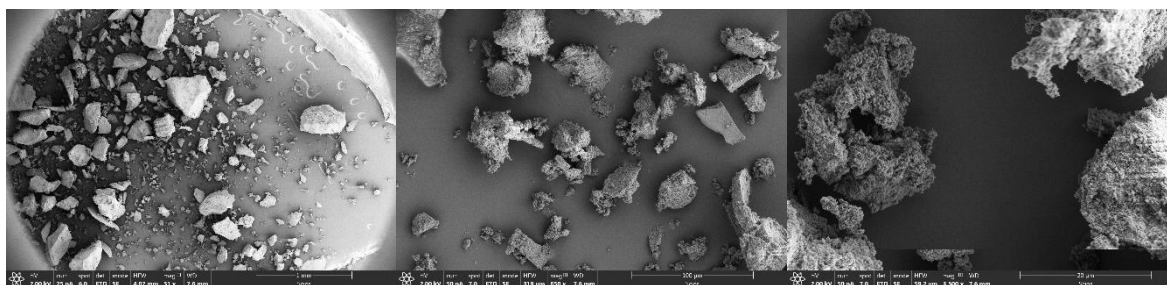

Fig. S12. SEM images for CPO-27-Mg1 afforded from MeOH/NaOH. From left to right, 1 mm; 100 μm; 10 μm

### 3.2. CPO-27-Ni1 in MeOH/NaOH

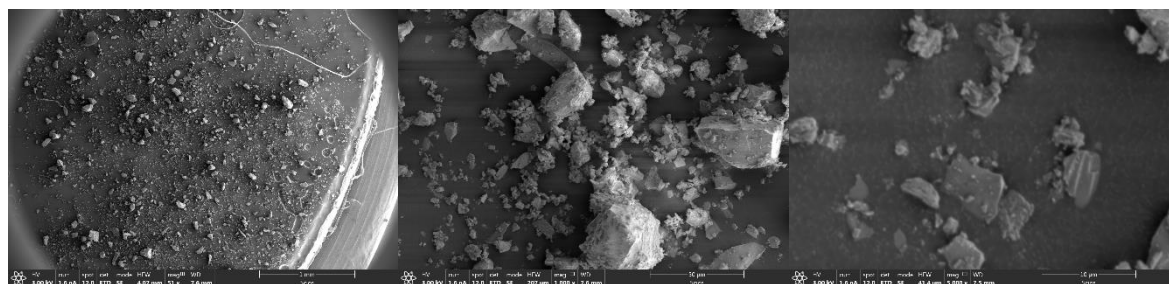

Fig. S13. SEM images for CPO-27-Ni1 afforded from MeOH/NaOH. From left to right, 1 mm; 50 μm; 10 μm

### 3.3. CPO-27-Zn2 in MeOH/TEA

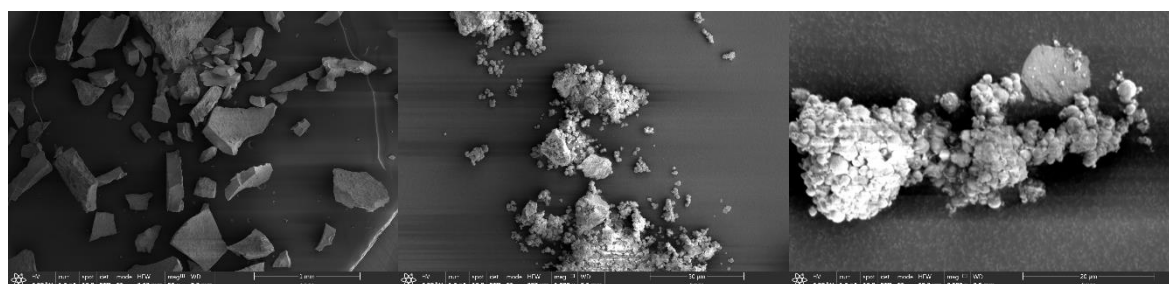

Fig. S14. SEM images for CPO-27-Zn2 afforded from MeOH/TEA. From left to right, 1 mm; 50 μm; 20 μm

### 3.4. CPO-27-Zn3 in MeOH/no base

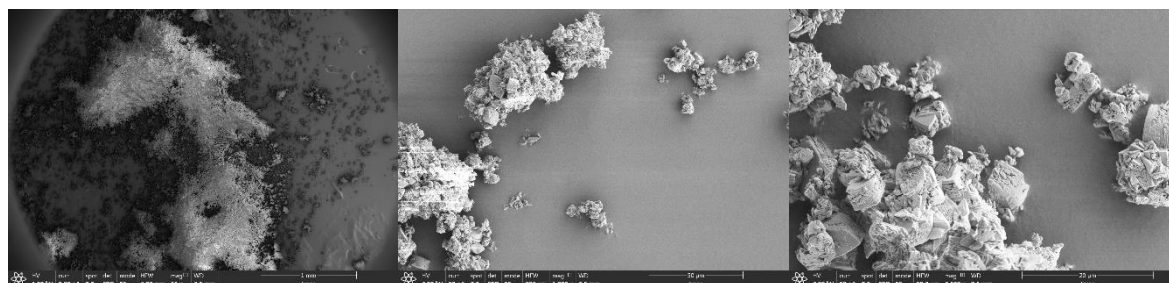

Fig. S15. SEM images for CPO-27-Zn3 afforded from MeOH without base. From left to right, 1 mm; 50 μm; 20 μm

### 3.5. CPO-27-Zn4 in THF/no base

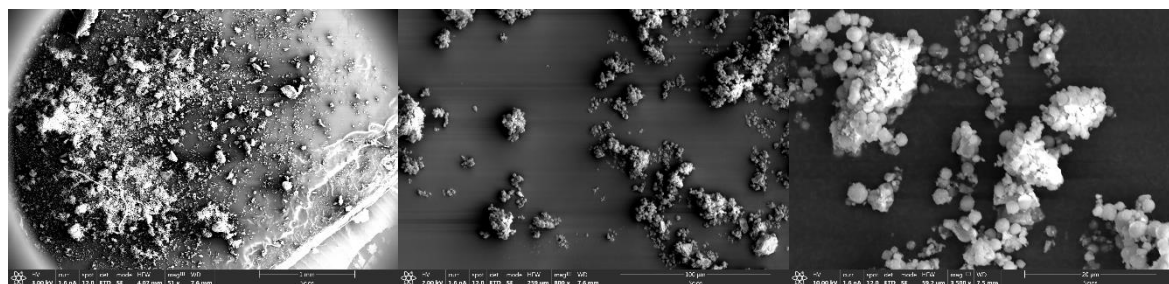

Fig. S16. SEM images for CPO-27-Zn4 afforded from THF without base. From left to right, 1 mm; 100 μm; 20 μm

### 3.6. CPO-27-Zn5 in THF/NaOH

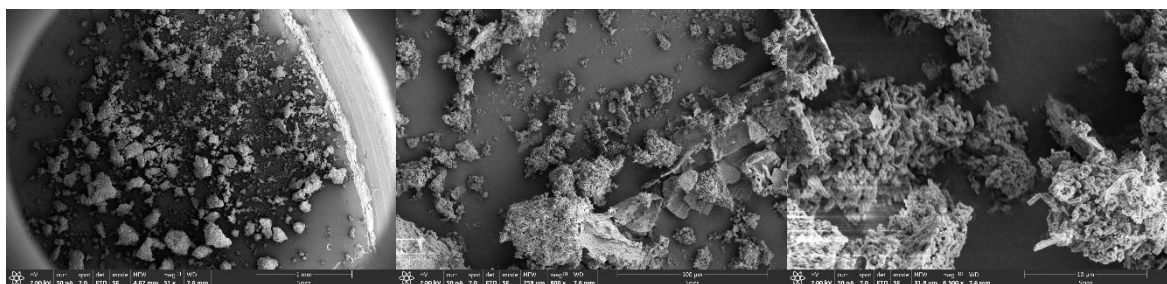

Fig. S17. SEM images for CPO-27-Zn5 afforded from THF/NaOH. From left to right, 1 mm; 100 μm; 10 μm

### 3.7. CPO-27-Zn6 in THF/TEA

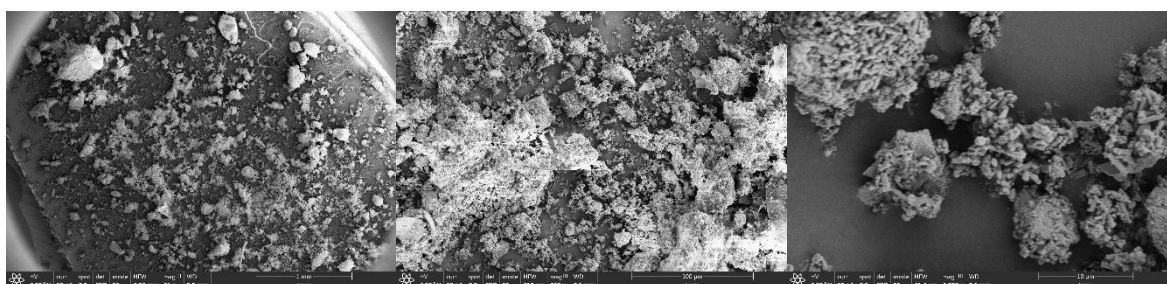

Fig. S18. SEM images for CPO-27-Zn6 afforded from THF/TEA. From left to right, 1 mm; 100 μm; 10 μm
